# Supplementary material
Source: Springer Nature journal article supplement (https://www.springermedizin.de/resource/supplementary/12936_2005_142_MOESM2_ESM.pdf/9546976)
Supplement: MOESM2 [file 9546976]

| locus                                                                                                 | forward primer                                                                                                    | reverse primer                                                                                                          |
|-------------------------------------------------------------------------------------------------------|-------------------------------------------------------------------------------------------------------------------|-------------------------------------------------------------------------------------------------------------------------|
| <b>MSP1 block2</b><br>conserved A +B<br>K1-type specific<br>MAD20-type specific<br>RO33-type specific | AAGCTTTAGAAGATGCAGTATTGAC<br>GAA ATTACTACA AAAGGTGCA AGTG<br>GAACAAGTCGAACAGCTGTTA<br>GCA AATACTCAAGTTGTTGCA AAGC | ATTCATTAATTTCTTCATATCCATC<br>AGATGAAGTATTTGAACGAGGTAAAGTG<br>TGAATTATCTGAAGGATTTGTACGTCTTGA<br>AGGATTTGCAGCACCTGGAGATCT |
| <b>MSP2</b><br>conserved 2+3<br>3D7-type specific<br>FC27-type specific                               | AACGAATTCATA AACAATGCTTATAATATGAGT<br>GCA GAA AGTAAGCCTTCTACTGGTGCT<br>GCAAATGAAGGTTCTAATACTAATAG                 | GATGAATTCTAGAACCATGCATATGTCCATGTT<br>GATTTGTTTCGGCATTATTATGA<br>GCTTTGGGTCCTTCTTCAGTTGATTC                              |
| <b>VarD</b><br>VarD 5' + 3'                                                                           | AGTTCACTTGGTTTCCCGC                                                                                               | CCCTGAAGATTTTAAGCGTC                                                                                                    |
| <b>microsatellites</b><br>C1M4<br>C3M27<br>C4M69                                                      | ATATCCTACAACGGTAAGCA<br>AGTATCATATTTGGTTAGATC<br>GAAATGGAGATAAACTATTAC                                            | GGCACATAAATAAATACATAC<br>TTTGGTTAACA AATTTCTTAC<br>AATTACACAACAGATGTGAA                                                 |
